# Supplementary material for: Simulation of the non-adiabatic dynamics of an enone-Lewis acid complex in an explicit solvent
Source: Royal Society of Chemistry journal article supplement (doi:10.1039/d4cp02492c), 2024-01-01
Supplement: d4cp02492c1.pdf [file d4cp02492c1.pdf]

# Supplementary Information: Simulation of the Non-Adiabatic Dynamics of an Enone-Lewis Acid Complex in an Explicit Solvent

Martin T. Peschel,<sup>a</sup> Jörg Kussmann,<sup>a</sup> Christian Ochsenfeld<sup>a,b</sup> and Regina de Vivie-Riedle<sup>a</sup>

<sup>a</sup> *Department of Chemistry, Ludwig-Maximilians-Universität München (LMU), Butenandtstr.  
5-13, D-81377 Munich, Germany*

<sup>b</sup> *Max-Planck-Institute for Solid State Research, Heisenbergstr. 1, D-70569 Stuttgart, Germany*

E-Mail: christian.ochsenfeld@cup.uni-muenchen.de

# 1 TDDFT benchmarks

The fast dissociation of the complex takes place mainly in  $S_1$ , thus, the most important figure of merit that a density functional should reproduce is the excited state gradient in  $S_1$ ,  $\nabla E_1$ . Apart from the gradient  $\nabla E_1$ , two other parameters are considered when choosing the density functional; 1) the  $S_0S_1$  energy gap  $\Delta E_{01}$ , relevant for the selection of initial geometries based on the calculated absorption spectrum; 2) the  $S_1S_2$  energy gap  $\Delta E_{12}$ , which might become relevant because the  $S_1$  and  $S_2$  states are energetically close in the FC region and thus  $S_2$  might be transiently populated even after an initial excitation to  $S_1$ .

A benchmark set was explicitly constructed for 2-cyclohexenone-BF<sub>3</sub>. From the short gas-phase dynamics presented in ref. 1,  $N = 96$  geometries were randomly sampled. At these geometries, excitation energies and gradients were calculated at the XMS-CASPT2(8,7)/cc-pVQZ<sup>2</sup> level of theory. All XMS-CASPT2 calculations were performed using an (8,7) active space containing two  $\pi$ -orbitals ( $\pi_1, \pi_2$ ), two  $\pi^*$ -orbitals ( $\pi_1^*, \pi_2^*$ ), the oxygen lone pair  $n$  and the  $\sigma$ - and  $\sigma^*$ -orbitals of the  $\alpha$ -C-C bond (see fig. S-1). The calculations employed state averaging over three states ( $S_0, S_1, S_2$ ), the single-state-single-reference flavor of multistate CASPT2 and an imaginary shift of 0.2. The cc-pVQZ basis set<sup>3</sup> was used with the resolution of the identity approximation and the cc-pVQZ-jkfit auxiliary basis. The benchmark calculations were performed using the OpenMOLCAS<sup>4</sup> and BAGEL<sup>5</sup> programs.

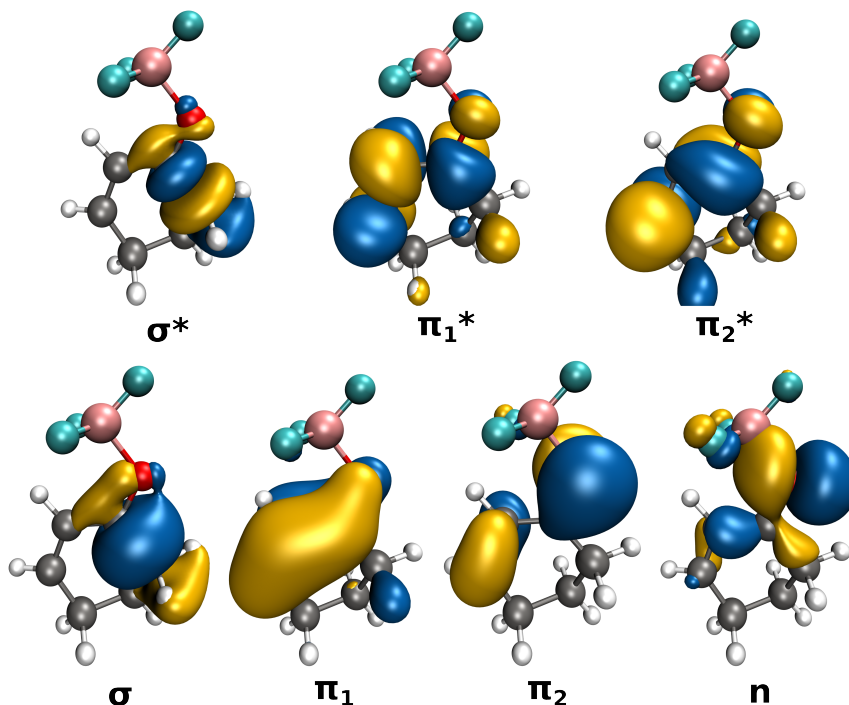

Figure S-1: Orbitals in the (8,7) active space of cyclohexenone-BF<sub>3</sub> (isovalue: 0.02).

There is a large number of DFT functionals available in the library LibXC.<sup>6</sup> Nearly all of them were tested (93 in total; some were excluded for technical reasons, see table S-2 for a list of all

tested functionals). Corrections due to dispersion (VV10<sup>7</sup>, D3<sup>8</sup>) were also tested. Since the overall errors for energies and gradients in excited states are much larger than in the ground state, the resulting corrections were found to be negligible. Since the dynamics can be performed at most with a triple-zeta basis set due to computational costs, all DFT calculations were performed using the def2-TZVP basis set. The different functionals  $f$  were compared to the benchmark calculations on the three criteria of 1)  $S_1$  gradients  $\nabla E_1$ , 2)  $S_1S_2$  energy gap  $\Delta E_{12}$ , 3)  $S_0S_1$  energy gap  $\Delta E_{01}$ . The RMSD for each criterion  $x$  and each functional  $f$  were calculated according to

$$\text{RMSD}(x, f) = \sqrt{\frac{\sum_i^N |x_i^f - x_i^{\text{CASPT2}}|^2}{N}}. \quad (1)$$

The RMSD values for each criterion  $x$  were shifted and scaled to obtain normalized values  $\text{NRMSD}(x, f)$ . This was done so that the best ten functionals for that criterion covered the range between 0 and 1.

Then, a combined measure of error  $M$  was calculated as

$$\begin{aligned} M(f) = & w_1 \cdot \text{NRMSD}(\nabla E_1, f) \\ & + w_2 \cdot \text{NRMSD}(\Delta E_{12}, f) \\ & + w_3 \cdot \text{NRMSD}(\Delta E_{01}, f) \end{aligned} \quad (2)$$

with weighting factors  $\{w_i\}$  that sum to 1. These weighting factors encode the relative importance of the accurate description of each benchmarked criterion for the process under study. Different functionals perform best, depending on the choice of  $\{w_i\}$ . In fig. S-2, the best-performing functionals (minimal  $M$ ) are shown, depending on  $w_1$ ,  $w_2$ , and  $w_3$ . For all functionals that are best performing at any choice of  $\{w_i\}$ , the RMSD values for each criterion are given in table S-1, and the averages over all 93 tested functionals are shown in the last row. The exact RMSD values for all tested functionals can be found in the appendix (section 1).

The prediction of the  $S_1S_2$  energy gap is the most difficult task with errors that are approximately a factor of three higher than for the  $S_0S_1$  energy gap. The functionals PBE-MOL0<sup>9</sup> and B97-3<sup>10</sup> perform significantly better in the prediction of the  $S_1S_2$  energy gap than all other functionals. Of these, PBE-MOL0 performs best for the  $S_0S_1$  energy gap. Thus, the functional PBE-MOL0, a non-empirically improved version of PBE0 for molecular properties,<sup>9</sup> was chosen for the dynamics. It is the second-best for  $\Delta E_{12}$ , the third-best for  $\Delta E_{01}$ , and provides gradients significantly better than the average functional. We do not make generalizing conclusions about the performance of functionals in other circumstances (other properties, other molecules, or even different excited states of the same molecule) from our benchmark data. Even though our benchmark tests a lot of different functionals, it focuses on one specific excited state of a single molecule. Thus, significance for and transferability to other cases are exceedingly limited.

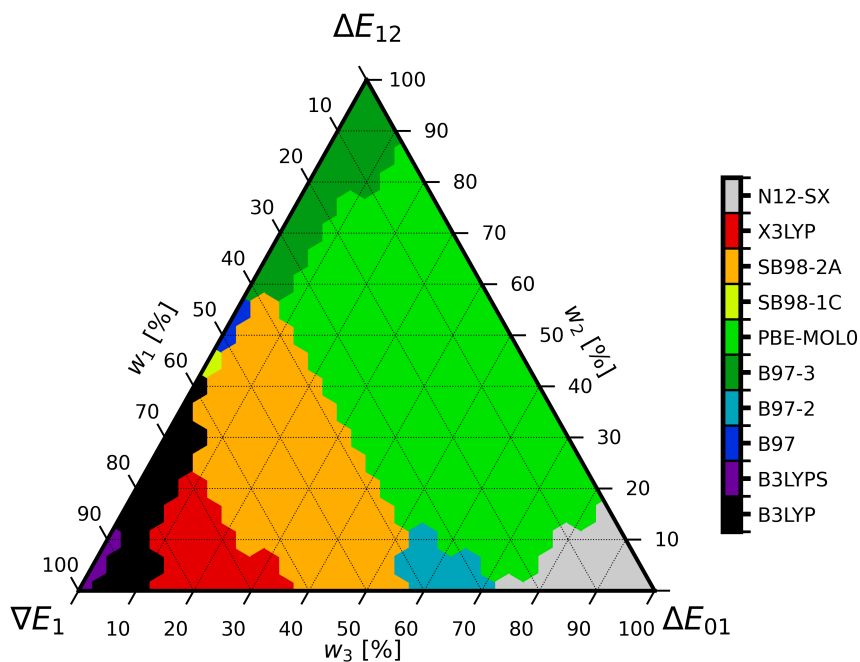

Figure S-2: Functionals with a minimal measure of error  $M$  according to eq. (2) for all different combinations of weights; weight  $w_1$  for the gradient  $\nabla E_1$ , weight  $w_2$  for the  $S_0S_1$  energy gap  $\Delta E_{01}$ , and weight  $w_3$  for the  $S_1S_2$  energy gap  $\Delta E_{12}$

However, a more general benchmark of TDDFT excited state gradients and couplings on a variety of small to medium-sized organic molecules (for example, Thiel's benchmark set<sup>11,12</sup>) away from the FC region might be a worthwhile undertaking in the future since existing benchmarks focus heavily on equilibrium geometries.<sup>13-15</sup>

Table S-1: Performance of selected best performing functionals compared to XMS-CASPT2(8,7)/cc-pVQZ. The last row shows the average for all 93 tested functionals.

| Functional | RMSD( $\nabla E_1$ ) | RMSD( $\Delta E_{01}$ ) | RMSD( $\Delta E_{12}$ ) |
|------------|----------------------|-------------------------|-------------------------|
| N12-SX     | 4.5786               | 0.1725                  | 0.7267                  |
| X3LYP      | 4.3673               | 0.1773                  | 0.7329                  |
| SB98-2A    | 4.4028               | 0.1753                  | 0.7204                  |
| SB98-1C    | 4.3895               | 0.1953                  | 0.7207                  |
| PBE-MOL0   | 4.5141               | 0.1733                  | 0.7096                  |
| B97-3      | 4.5263               | 0.1811                  | 0.7048                  |
| B97-2      | 4.4534               | 0.1740                  | 0.7214                  |
| B97        | 4.3926               | 0.1939                  | 0.7202                  |
| B3LYP      | 4.3367               | 0.1859                  | 0.7325                  |
| B3LYPS     | 4.3186               | 0.2479                  | 0.7509                  |
| Average    | 5.6960               | 0.3411                  | 0.7873                  |

Table S-2: Performance of all tested functionals compared to XMS-CASPT2(8,7)/cc-pVQZ.

| Functional   | RMSD( $\nabla E_1$ ) | RMSD( $\Delta E_{01}$ ) | RMSD( $\Delta E_{12}$ ) |
|--------------|----------------------|-------------------------|-------------------------|
| APBE0        | 4.5314               | 0.1736                  | 0.7109                  |
| APF          | 4.5197               | 0.1771                  | 0.7158                  |
| B1LYP        | 4.4076               | 0.1796                  | 0.7298                  |
| B1PW91       | 4.5500               | 0.1749                  | 0.7122                  |
| B1WC         | 4.5950               | 0.2606                  | 0.7463                  |
| B3LYP        | 4.3367               | 0.1859                  | 0.7325                  |
| B3LYP3       | 4.3377               | 0.1862                  | 0.7326                  |
| B3LYP5       | 4.3377               | 0.1862                  | 0.7326                  |
| B3LYP-MCM1   | 4.3878               | 0.1959                  | 0.7433                  |
| B3LYP-MCM2   | 4.5538               | 0.1739                  | 0.7389                  |
| B3LYPS       | 4.3186               | 0.2479                  | 0.7509                  |
| B3P86        | 4.4419               | 0.1928                  | 0.7285                  |
| B3P86-NWCHEM | 4.4528               | 0.1900                  | 0.7286                  |
| B3PW91       | 4.4380               | 0.1932                  | 0.7196                  |
| B5050LYP     | 5.7086               | 0.5538                  | 0.8677                  |
| B97          | 4.3926               | 0.1939                  | 0.7202                  |
| B97-1        | 4.4052               | 0.1837                  | 0.7200                  |
| B97-1P       | 4.3759               | 0.2388                  | 0.7333                  |
| B97-2        | 4.4534               | 0.1740                  | 0.7214                  |
| B97-3        | 4.5263               | 0.1811                  | 0.7048                  |
| B97-K        | 4.9029               | 0.3616                  | 0.7495                  |
| BHANDH       | 6.3031               | 0.4925                  | 0.8426                  |
| BHANDHLYP    | 5.6400               | 0.5575                  | 0.8718                  |
| BLYP35       | 4.7566               | 0.2983                  | 0.7586                  |
| CAM-B3LYP    | 5.0122               | 0.3252                  | 0.7657                  |

Continued on next page

Table S-2: Performance of all tested functionals compared to XMS-CASPT2(8,7)/cc-pVQZ.  
(Continued)

| Functional     | RMSD( $\nabla E_1$ ) | RMSD( $\Delta E_{01}$ ) | RMSD( $\Delta E_{12}$ ) |
|----------------|----------------------|-------------------------|-------------------------|
| CAMH-B3LYP     | 4.6893               | 0.2438                  | 0.7420                  |
| CAM-O3LYP      | 37.1717              | 1.1106                  | 1.5859                  |
| CAM-PBEH       | 5.4353               | 0.3216                  | 0.7875                  |
| CAM-QTP-00     | 6.9839               | 0.8142                  | 1.0334                  |
| CAM-QTP-01     | 5.9665               | 0.5240                  | 0.8520                  |
| CAM-QTP-02     | 6.3773               | 0.6135                  | 0.8985                  |
| CAP0           | 4.6025               | 0.1752                  | 0.7108                  |
| CASE21         | 4.5052               | 0.1736                  | 0.7134                  |
| EDF2           | 4.4099               | 0.2186                  | 0.7493                  |
| HAPBE          | 4.4381               | 0.1976                  | 0.7186                  |
| HFLYP          | 10.1031              | 1.4713                  | 1.5253                  |
| HPBEINT        | 4.5996               | 0.2533                  | 0.7376                  |
| HSE03          | 4.5382               | 0.1735                  | 0.7154                  |
| HSE06          | 4.5395               | 0.1747                  | 0.7161                  |
| HSE12          | 4.7516               | 0.2059                  | 0.7203                  |
| HSE12S         | 4.9283               | 0.2487                  | 0.7291                  |
| HSE-SOL        | 4.8391               | 0.1822                  | 0.7210                  |
| KMLYP          | 6.6171               | 0.6222                  | 0.9019                  |
| LB07           | 6.8732               | 0.5454                  | 0.8063                  |
| LC-BLYP        | 5.4560               | 0.3400                  | 0.7741                  |
| LC-BLYP-EA     | 5.2215               | 0.2804                  | 0.7669                  |
| LC-BLYPR       | 5.4216               | 0.3436                  | 0.7634                  |
| LC-BOP         | 6.5177               | 0.6070                  | 0.8533                  |
| LC-PBEOP       | 5.4328               | 0.3346                  | 0.7544                  |
| LC-QTP         | 6.5925               | 0.6135                  | 0.8695                  |
| LC-VV10        | 6.3408               | 0.5627                  | 0.8051                  |
| LC-WPBE        | 5.9596               | 0.4686                  | 0.7656                  |
| LC-WPBE08-WHS  | 6.3408               | 0.5627                  | 0.8051                  |
| LC-WPBEH-WHS   | 6.7500               | 0.6758                  | 0.8871                  |
| LC-WPBESOL-WHS | 7.4771               | 0.8027                  | 0.9645                  |
| LC-WPBE-WHS    | 5.9605               | 0.4694                  | 0.7640                  |
| LRC-WPBE       | 5.1949               | 0.2690                  | 0.7181                  |
| LRC-WPBEH      | 5.0020               | 0.2578                  | 0.7334                  |
| MB3LYP-RC04    | 4.3698               | 0.1810                  | 0.7319                  |
| MCAM-B3LYP     | 4.4916               | 0.1926                  | 0.7303                  |
| MPW1K          | 5.4188               | 0.4027                  | 0.7760                  |
| MPW1LYP        | 4.4127               | 0.1794                  | 0.7342                  |
| MPW1PBE        | 4.5795               | 0.1748                  | 0.7146                  |
| MPW1PW         | 4.5643               | 0.1749                  | 0.7153                  |
| MPW3LYP        | 4.3686               | 0.1776                  | 0.7357                  |
| MPW3PW         | 4.4494               | 0.1938                  | 0.7233                  |

Continued on next page

Table S-2: Performance of all tested functionals compared to XMS-CASPT2(8,7)/cc-pVQZ.  
(Continued)

| Functional | RMSD( $\nabla E_1$ ) | RMSD( $\Delta E_{01}$ ) | RMSD( $\Delta E_{12}$ ) |
|------------|----------------------|-------------------------|-------------------------|
| MPWLYP1M   | 4.5101               | 0.4322                  | 0.8801                  |
| O3LYP      | 4.3838               | 0.2905                  | 0.7542                  |
| PBE0-13    | 4.9022               | 0.2436                  | 0.7268                  |
| PBE-2X     | 6.3504               | 0.6247                  | 0.8828                  |
| PBE38      | 5.1115               | 0.3056                  | 0.7421                  |
| PBE50      | 5.9021               | 0.5183                  | 0.8256                  |
| PBEB0      | 4.5604               | 0.1754                  | 0.7195                  |
| PBEH       | 4.5878               | 0.1745                  | 0.7148                  |
| PBE-MOL0   | 4.5141               | 0.1733                  | 0.7096                  |
| PBE-MOLB0  | 4.4977               | 0.1749                  | 0.7151                  |
| PBE-SOL0   | 4.8204               | 0.1777                  | 0.7262                  |
| QTP17      | 7.0301               | 0.7262                  | 0.9695                  |
| RCAM-B3LYP | 6.2604               | 0.5920                  | 0.8841                  |
| SB98-1A    | 4.6156               | 0.1770                  | 0.7458                  |
| SB98-1B    | 4.4934               | 0.1921                  | 0.7208                  |
| SB98-1C    | 4.3895               | 0.1953                  | 0.7207                  |
| SB98-2A    | 4.4028               | 0.1753                  | 0.7204                  |
| SB98-2B    | 4.4724               | 0.1763                  | 0.7263                  |
| SB98-2C    | 4.4288               | 0.1778                  | 0.7236                  |
| WB97       | 5.8680               | 0.5234                  | 0.8285                  |
| WB97X      | 5.5078               | 0.4394                  | 0.7998                  |
| WC04       | 10.4154              | 0.8560                  | 1.0653                  |
| WHPBE0     | 20.3441              | 0.4801                  | 0.8160                  |
| WP04       | 6.0977               | 0.1899                  | 0.7554                  |
| X3LYP      | 4.3673               | 0.1773                  | 0.7329                  |
| N12-SX     | 4.5786               | 0.1725                  | 0.7267                  |
| SOGGA11-X  | 4.9354               | 0.3666                  | 0.7592                  |

## 2 Details of the kinetic model

The number of trajectories in Fig. 5 showing a C-C=O-B twist can be fit using a three-step kinetic model.

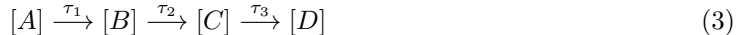

The first step describes a delay in the onset of the C-C=O-B twist, which is caused by the initial fast O-B bond elongation, during which the kinetic energy of the dissociating complex is too high to observe a significant twisting motion. The second step describes the twisting of the C-C=O-B dihedral. The third step describes the un-twisting of the C-C=O-B dihedral due to ISC into the triplet states. Thus it should correspond to the ISC time of  $1.8 \pm 0.3$  ps. We assume irreversible first-order kinetic for all steps.

$$\begin{aligned} \frac{d[A]}{dt} &= -[A]/\tau_1 \\ \frac{d[B]}{dt} &= +[A]/\tau_1 \\ \frac{d[B]}{dt} &= -[B]/\tau_2 \\ \frac{d[C]}{dt} &= +[B]/\tau_2 \\ \frac{d[C]}{dt} &= -[C]/\tau_3 \\ \frac{d[D]}{dt} &= +[C]/\tau_3 \end{aligned} \quad (4)$$

Integration and fitting using the SciPy library<sup>16</sup> (initial conditions  $[A](t_0) = 1, [B](t_0) = 0, [C](t_0) = 0, [D](t_0) = 0$ ) yields the time constants in table S-3.

Table S-3: Results of the kinetic model fit.

| Parameter | Value   |
|-----------|---------|
| $\tau_1$  | 0.06 ps |
| $\tau_2$  | 0.16 ps |
| $\tau_3$  | 1.57 ps |



### 3 Time-resolved spectra

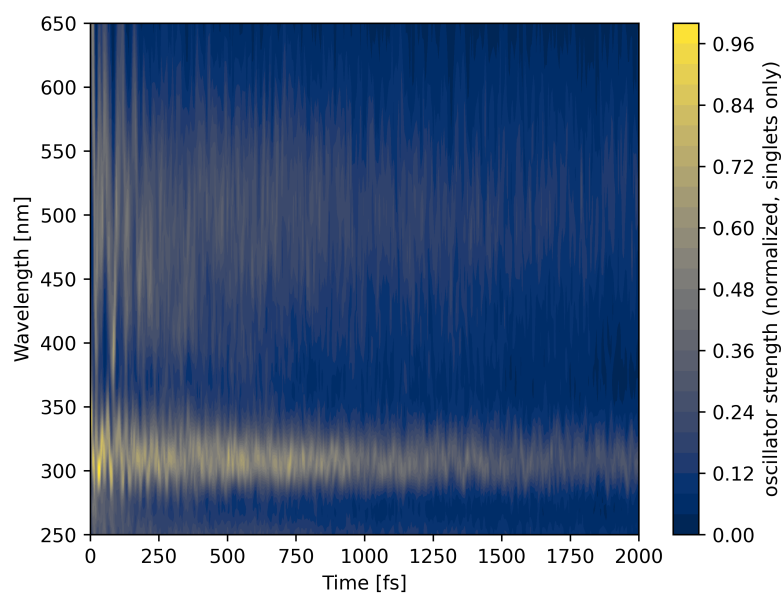

Figure S-3: Oscillator strengths for transitions originating in all active states during the trajectories. Time-resolved spectra were calculated at the PBE/mol0/def2-TZVP level of theory using 30 singlet states. Geometries for the spectra calculation were sampled from the trajectories including triplet states at 10 fs intervals. Spectra were broadened with Gaussians ( $\sigma = 0.1$  eV).

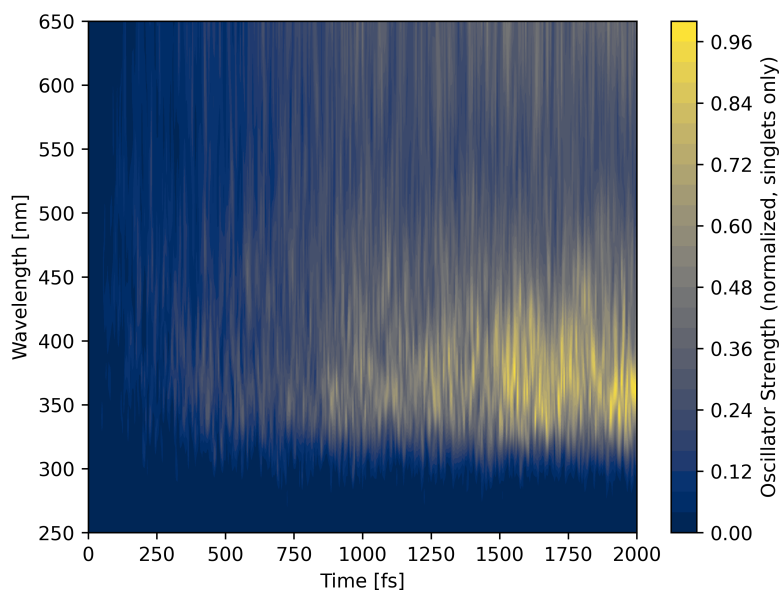

Figure S-4: Oscillator strengths for transitions originating in all active states during the trajectories. Time-resolved spectra were calculated at the PBE/mol0/def2-TZVP level of theory using 30 triplet states. Geometries for the spectra calculation were sampled from the trajectories including triplet states at 10 fs intervals. Spectra were broadened with Gaussians ( $\sigma = 0.1$  eV).

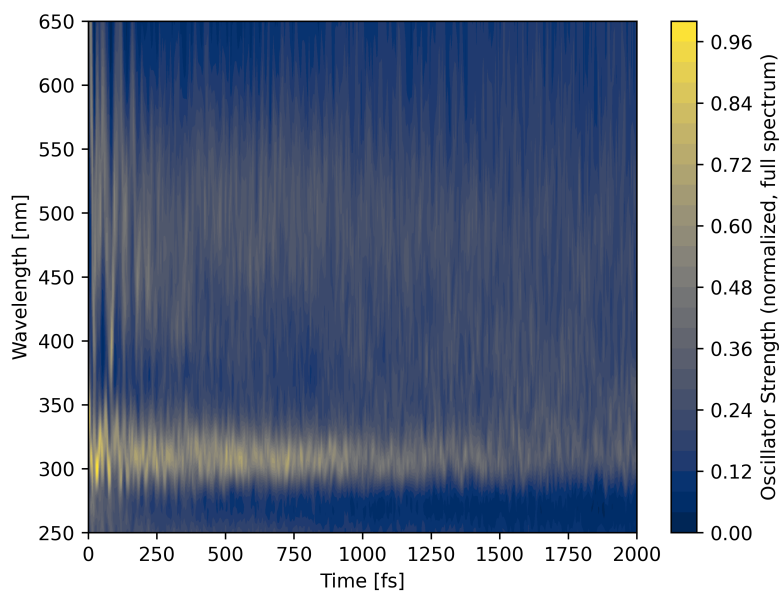

Figure S-5: Oscillator strengths for transitions originating in all active states during the trajectories. Time-resolved spectra were calculated at the PBE/mol0/def2-TZVP level of theory using 30 singlet and 30 triplet states. Geometries for the spectra calculation were sampled from the trajectories including triplet states at 10 fs intervals. Spectra were broadened with Gaussians ( $\sigma = 0.1$  eV).

## 4 Software for visualization and plotting

Molecular visualizations (structures, orbitals) in this work were created using VMD 1.9.3.<sup>17,18</sup> Plots were generated using Matplotlib 3.7.1.<sup>19</sup> Figures 2, 3, 5, and S-1 were assembled using Inkscape 1.3.<sup>20</sup>

## References

- [1] Martin T. Peschel, Piotr Kabaciński, Daniel P. Schwinger, Erling Thyryhaug, Giulio Cerullo, Thorsten Bach, Jürgen Hauer, and Regina de Vivie-Riedle. Activation of 2-Cyclohexenone by  $\text{BF}_3$  Coordination: Mechanistic Insights from Theory and Experiment. *Angewandte Chemie International Edition*, 60(18):10155–10163, 2021.
- [2] Toru Shiozaki, Werner Györfy, Paolo Celani, and Hans-Joachim Werner. Communication: Extended multi-state complete active space second-order perturbation theory: Energy and nuclear gradients. *Journal of Chemical Physics*, 135(8):081106, 8 2011.
- [3] Jr. Dunning, Thom H. Gaussian basis sets for use in correlated molecular calculations. I. The atoms boron through neon and hydrogen. *The Journal of Chemical Physics*, 90(2):1007–1023, 01 1989.
- [4] Francesco Aquilante, Jochen Autschbach, Alberto Baiardi, Stefano Battaglia, Veniamin A. Borin, Liviu F. Chibotaru, Irene Conti, Luca De Vico, Mickaël Delcey, Ignacio Fdez Galván, Nicolas Ferré, Leon Freitag, Marco Garavelli, Xuejun Gong, Stefan Knecht, Ernst D. Larsson, Roland Lindh, Marcus Lundberg, Per Åke Malmqvist, Artur Nenov, Jesper Norell, Michael Odellius, Massimo Olivucci, Thomas B. Pedersen, Laura Pedraza-González, Quan M. Phung, Kristine Pierloot, Markus Reiher, Igor Schapiro, Javier Segarra-Martí, Francesco Segatta, Luis Seijo, Saumik Sen, Dumitru Claudiu Sergentu, Christopher J. Stein, Liviu Ungur, Morgane Vacher, Alessio Valentini, and Valera Veryazov. Modern quantum chemistry with [Open]Molcas. *Journal of Chemical Physics*, 152:214117, 2020.
- [5] Toru Shiozaki. BAGEL: Brilliantly Advanced General Electronic-structure Library. *Wiley Interdisciplinary Reviews: Computational Molecular Science*, 8(1):e1331, 1 2018.
- [6] Susi Lehtola, Conrad Steigemann, Micael J.T. Oliveira, and Miguel A.L. Marques. Recent developments in libxc – A comprehensive library of functionals for density functional theory. *SoftwareX*, 7:1–5, 1 2018.
- [7] Oleg A. Vydrov and Troy Van Voorhis. Nonlocal van der Waals density functional: The simpler the better. *Journal of Chemical Physics*, 133(24):244103, 12 2010.
- [8] Stefan Grimme, Jens Antony, Stephan Ehrlich, and Helge Krieg. A consistent and accurate *ab initio* parametrization of density functional dispersion correction (DFT-D) for the 94 elements H-Pu. *Journal of Chemical Physics*, 132(15):154104, 4 2010.
- [9] Jorge M. del Campo, José L. Gázquez, S. B. Trickey, and Alberto Vela. Non-empirical improvement of PBE and its hybrid PBE0 for general description of molecular properties. *Journal of Chemical Physics*, 136(10):104108, 3 2012.

- [10] Thomas W. Keal and David J. Tozer. Semiempirical hybrid functional with improved performance in an extensive chemical assessment. *Journal of Chemical Physics*, 123(12):121103, 9 2005.
- [11] Marko Schreiber, Mario R. Silva-Junior, Stephan P. A. Sauer, and Walter Thiel. Benchmarks for electronically excited states: CASPT2, CC2, CCSD, and CC3. *Journal of Chemical Physics*, 128(13):134110, 4 2008.
- [12] Mario R. Silva-Junior, Marko Schreiber, Stephan P. A. Sauer, and Walter Thiel. Benchmarks for electronically excited states: Time-dependent density functional theory and density functional theory based multireference configuration interaction. *Journal of Chemical Physics*, 129(10):104103, 9 2008.
- [13] Jun Wang and Bo Durbeej. How accurate are TD-DFT excited-state geometries compared to DFT ground-state geometries? *Journal of Computational Chemistry*, 41(18):1718–1729, 7 2020.
- [14] Amjad Ali, Muhammad Imran Rafiq, Zhuohan Zhang, Jinru Cao, Renyong Geng, Baojing Zhou, and Weihua Tang. TD-DFT benchmark for UV-visible spectra of fused-ring electron acceptors using global and range-separated hybrids. *Physical Chemistry Chemical Physics*, 22(15):7864–7874, 2020.
- [15] Rudraditya Sarkar, Martial Boggio-Pasqua, Pierre-François Loos, and Denis Jacquemin. Benchmarking TD-DFT and Wave Function Methods for Oscillator Strengths and Excited-State Dipole Moments. *Journal of Chemical Theory and Computation*, 17(2):1117–1132, 2 2021.
- [16] Pauli Virtanen, Ralf Gommers, Travis E. Oliphant, Matt Haberland, Tyler Reddy, David Cournapeau, Evgeni Burovski, Pearu Peterson, Warren Weckesser, Jonathan Bright, Stéfan J. van der Walt, Matthew Brett, Joshua Wilson, K. Jarrod Millman, Nikolay Mayorov, Andrew R. J. Nelson, Eric Jones, Robert Kern, Eric Larson, C J Carey, İlhan Polat, Yu Feng, Eric W. Moore, Jake VanderPlas, Denis Laxalde, Josef Perktold, Robert Cimrman, Ian Henriksen, E. A. Quintero, Charles R. Harris, Anne M. Archibald, Antônio H. Ribeiro, Fabian Pedregosa, Paul van Mulbregt, and SciPy 1.0 Contributors. SciPy 1.0: Fundamental Algorithms for Scientific Computing in Python. *Nature Methods*, 17:261–272, 2020.
- [17] William Humphrey, Andrew Dalke, and Klaus Schulten. VMD – Visual Molecular Dynamics. *Journal of Molecular Graphics*, 14:33–38, 1996.
- [18] John Stone. *An Efficient Library for Parallel Ray Tracing and Animation*. Master’s thesis, Computer Science Department, University of Missouri-Rolla, April 1998.

- [19] Thomas A Caswell, Antony Lee, Elliott Sales de Andrade, Michael Droettboom, Tim Hoffmann, Jody Klymak, John Hunter, Eric Firing, David Stansby, Nelle Varoquaux, Jens Hede-gaard Nielsen, Benjamin Root, Ryan May, Oscar Gustafsson, Phil Elson, Jouni K. Seppänen, Jae-Joon Lee, Darren Dale, hannah, Damon McDougall, Andrew Straw, Paul Hobson, Kyle Sunden, Greg Lucas, Christoph Gohlke, Adrien F. Vincent, Tony S Yu, Eric Ma, Steven Silvester, and Charlie Moad. `matplotlib/matplotlib`: Rel: v3.7.1, March 2023.
- [20] Inkscape Project. `Inkscape`: Rel: v1.3, July 2023.
